# Supplementary material for: Disease Progression of WHIM Syndrome in an International Cohort of 66 Pediatric and Adult Patients
Source: J Clin Immunol. 2022 Aug 10;42(8):1748–65. doi: 10.1007/s10875-022-01312-7 (PMC9700649; doi:10.1007/s10875-022-01312-7)
Supplement: Supplementary file 4 — (XLSX 16 kb) [file 10875_2022_1312_MOESM3_ESM.xlsx]

## Sheet: Sheet1
Pt count	Current Age	Period of Observation	Sex	Phenotypes	Amino acid change	Mutation	Neutropenia (age)	Lymphopenia (age)	Hypogammaglobulinemia (age)	Myelokathexis	Infections (age)	Warts (age)	Published
1	14y0m	13y11m	F	HIM	p.Arg334Ter	DN	2yo3mo	9yo	12yo	yes	1mo	none	No
2	7y11m	7y5m	F	HIM	p.Ser338Ter	DN	1yo	4yo3mo	4yo3mo	yes	6mo	none	No
3	18y1m	17y7m	F	HIM	p.Arg334Ter	DN	2yo	2yo	6yo	yes	6mo	none	No
4	16y1m	15y1m	M	WHIM	p.Arg334Ter	DN	2yo	2yo	7yo	yes	1yo	13yo	No
5	11y9m	11y6m	F	WHI(*)	n/a	DN	3mo	2yo5mo	10y3mo	n/a	3mo	9yo	No
6	7y10m	6y7m	F	HM	p.Arg334Ter	DN	none	none	4yo	yes	none	none	No
7	16y4mo	15y10m	M	WI(*)	p.Arg334Ter	familial pedigree II	6mo	6mo	none	n/a	6mo	7yo	No
8	17y2mo	10y2m	F	WI(*)	p.Arg334Ter	familial - pedigree II	13yo	13yo	none	n/a	<1 yo (infancy)	7yo	No
9	2y	1y9m	M	HI(*)	p.Arg334Ter	familial - pedigree III	3mo	1yo5mo	4mo	n/a	3mo	none	No
10	12y11m	9y11m	F	WHIM	p.Leu326GlnfsTer17	DN	8yo	10yo	10yo	yes	3yo	4yo	No
11	38y11m	38y11m	F	WHI(*)	p.Ser338Ter	n/a	2-3yo	Childhood	3yo	n/a	<1 yo (infancy)	10yo	No
12	42y1m	37y1m	F	WHIM	p.Ser339PhefsTer6	DN	17yo	11yo	40yo	yes	11yo	<5yo	PMID: 34973340
13	1y5m	1y5m	F	none	p.Ser339PhefsTer6	familial - pedigree IV	<1 yo (infancy)	<1yo (infancy)	none	n/a	none	none	PMID: 33415666 PMID: 34973340
14	15y0m	14y9m	F	HIM	p.Leu326ProfsTer18	DN	7yo	3yo11mo	4yo7mo	yes	3mo	none	No
15	8y1m	7y9m	M	HIM	p.Ser338Ter	DN	4mo	7yo6mo	10yo	yes	6mo	none	No
16	3y6m	3y3m	M	HIM	p.Arg334Ter	familial - pedigree V	6mo	3mo	3mo	yes	n.a.	none	No
17	41y5m	37y5m (deceased)	F	WIM	p.Arg334Ter	unknown pedigree V	10yo	10yo	none	yes	4yo	34yo	No
18	9y3m	8y9m	F	HIM	p.Arg334Ter	DN	2yo	4yo	4yo	yes	6mo	none	No
19	6y9m	6y7m	M	HIM	p.Glu343Ter	DN	2mo	1yo10mo	8mo	yes	1yo10mo	none	No
20	19y0m	19y0m	M	HIM	p.Arg334Ter	DN	1yo	15yo6mo	15yo6mo	yes	<1 yo (infancy)	none	No
21	5y10m	5y10m	F	HIM	p.Arg334Ter	DN	<1 yo (infancy)	2yo9mo	2yo9mo	yes	6mo	none	No
22	11y3m	11y2m	F	HIM	p.Ser324PhefsTer21	DN	4mo	3yo11mo	3yo	yes	1mo	none	No
23	18y0m	17y7m	M	WHIM	p.Arg334Ter	DN	1yo5mo	1yo5mo	2yo	yes	5mo	16yo	No
24	9y0m	7y7m	F	M	p.Arg334Ter	DN	1yo5mo	3yo	none	yes	none	none	No
25	12y0m	10y10m	F	I(*)	p.Arg334Ter	DN	2yo	2yo	none	n/a	1yo2mo	none	No
26	61y0m	58y0m	M	WHIM	p.Arg334Ter	DN	3yo	3yo	3yo	yes	n.a.	29yo	No
27	31y0m	30y0m	F	IM	p.Arg334Ter	DN pedigree III	1yo	10 yo	none	yes	1yo	none	No
28	7y9m	5y9m	F	WIM	p.Arg334Ter	n/a	2yo	2yo5mo	none	yes	11.5mo	6yo	No
29	21y7m	20y7m	F	HIM	p.Ser338Ter	n/a	1yo	6yo	6yo	yes	1yo	none	No
30	27y11m	21y11m	F	WHIM	p.Arg334Ter	DN	8yo	8 yo	8yo	yes	n.a.	6yo	No
31	26y0m	21y0m	F	WHIM	p.Arg334Ter	DN	5yo	10yo	18yo	yes	5yo	22yo	No
32	8 yo	5y0m	F	HIM	p.Arg334Ter	DN	3yo	4yo	4yo	yes	3yo	none	PMID: 28353164
33	12y0m	10y11m	F	WHIM	n/a	n/a	1yo1mo	1yo 6mo	2yo	yes	8mo	7yo	PMID: 23049346
34	25y9m	24y9m	F	WHIM	p.Arg334Ter	DN	2yo2mo	n/a	3yo	yes	1yo	3yo	PMID: 20472031
35	12y5m	11y5m	M	WI(*)	p.Thr318AsnfsTer26	DN	6yo	6yo	none	n/a	1yo	7yo	No
36	4y5m	4y5m	M	IM	p.Glu343Ter	familial - pedigree VI	at birth	at birth	none	yes	2mo	none	PMID: 33415666; PMID: 31652152
37	6y0m	5y9m	M	IM	p.Val340LeufsTer27	familial - pedigree VII	3mo	4 yo	none	yes	3mo	none	No
38	7y0m	6y0m	F	I(*)	p.Val340LeufsTer27	familial - pedigree VII	4yo	7yo	none	n/a	1yo	none	No
39	36y0m	35y9m	F	IM	p.Val340LeufsTer27	familial - pedigree VII	24yo	24 yo	none	yes	3mo	none	No
40	31y0m	31y0m	M	WI(*)	p.Val340LeufsTer27	familial - pedigree VII	24yo	30yo	n.a.	n/a	<1 yo (infancy)	25yo	No
41	15y0m	12y0m	M	WHIM	p.Arg334Ter	DN	9yo6mo	9y6mo	9yo6mo	yes	3yo	9yo	No
42	14y0m	14y0m	F	IM	p.Ser338Ter	familial - pedigree VIII	<1 yo (infancy)	1 yo	none	yes	5yo	none	No
43	17y0m	15y0m	M	HI(*)	p.Ser338Ter	familial - pedigree VIII	2yo	none	15yo	n/a	2yo	none	No
44	49y0m	47y0m	M	IM	p.Ser338Ter	familial - pedigree VIII	13yo	none	none	yes	2yo	none	No
45	20y0m	13y0m	F	IM	p.Ser338Ter	DN	7yo	none	none	yes	15yo	none	No
46	8y11m	8y1m	F	HM	p.Arg334Ter	DN	10mo	10mo	10mo	yes	none	none	PMID: 29974365
47	12y2m	8y2m	F	HI(*)	n/a	DN	4yo	4yo	4yo	n/a	n.a.	none	No
48	16y3m	15y3m	F	HIM	p.Ser338Ter	DN	2yo	2yo	2yo	yes	12mo	none	No
49	37y10m	37y10m	F	WHI(*)	p.Ser338Ter	DN - pedigree IX	3mo	3mo	35yo	n/a	<1 yo (infancy)	25yo	No
50	9y9m	8y11m	M	HI(*)	p.Ser338Ter	familial - pedigree IX	1mo	1mo	2.5yo	n/a	2mo	none	No
51	5y2m	4y4m	F	I(*)	p.Arg322GlnfsTer22	DN	11mo	10mo	none	n/a	10mo	none	PMID: 33415666
52	4y10m	4y10m	F	I(*)	p.Ser319LeufsTer2	familial - pedigree X	<1 yo (infancy)	At birth	none	n/a	7mo	none	No
53	14y1m	12y11m	M	WHIM	p.Arg334Ter	DN	1yo2mo	none	1yo2mo	yes	1yo2mo	6yo	No
54	24y0m	24y0m	M	IM	p.Leu326ProfsTer18	DN	<1 yo (infancy)	<1 yo (infancy)	none	yes	6mo	none	No
55	7y6m	6y0m	M	HIM	p.Arg334Ter	DN	1.5yo	1.5yo	5yo	yes	1.5yo	none	No
56	9y5m	9y5m	F	HIM	p.Ser324ProfsTer42	familial - pedigree XI	<1 yo (infancy)	6 mo	7mo	yes	1mo	none	No
57	14y1m	13y4m	M	WIM	p.Arg334Ter	DN	9mo	1yo10mo	none	yes	2yo	13yo	No
58	13y3m	13y3m	F	WI(*)	p.Arg334Ter	familial - pedigree XII	<1 yo (infancy)	13y	none	n/a	5 yo	11yo	No
59	2y0m	2y0m	M	WHIM	p.Arg334Ter	familial - pedigree XIII	<1 yo (infancy)	none	20mo	yes	2yo	22mo	PMID: 31493092 PMID: 33415666
60	29y6m	27y6m	F	WHIM	p.Ser324ProfsTer42	familial - pedigree XIV	2yo	12yo	11yo	yes	2yo	13yo	PMID: 26464197
61	23y8m	22y8m	F	HM	p.Arg334Ter	familial - pedigree XV	1yo	2 yo	12yo	yes	none	none	No
62	53y6m	57y0m	F	WHIM	p.Arg334Ter	DN pedigree II	6mo	n/a	n/a	n/a	6mo	6yo	No
63	12y0m	n.d.	M	IM	p.Lys327ArgfsTer17	n/a	<1 yo (infancy)	4yo	none	yes	<1 yo (infancy)	none	No
64	17y11m	9y11m	F	IM	p.Ser346ProfsTer12	DN	7mo	2yo	none	Only a subset of neutrophils with myelokathexis	1yo	none	No
65	18y6m	6m	M	I(*)	p.Ser339LeufsTer27	n/a	16yo	16yo	none	yes	n/a	none	No
66	36y0m	n.d.	M	WHIM	p.Ser346Ter	DN	13yo	36yo	13yo	unclear	13yo	10yo	No
