# Supplementary material for: Disease Progression of WHIM Syndrome in an International Cohort of 66 Pediatric and Adult Patients
Source: J Clin Immunol. 2022 Aug 10;42(8):1748–65. doi: 10.1007/s10875-022-01312-7 (PMC9700649; doi:10.1007/s10875-022-01312-7)
Supplement: Supplementary file 5 — (XLSX 20 kb) [file 10875_2022_1312_MOESM4_ESM.xlsx]

## Sheet: CXCR4
																	Variant classification
															In silicio prediction		ACMG/AMP criteria							ACMG/AMP final classification
Genomic coordinates GRCh37 GRCh38	Nucleotide change* (UniProt canonical P61073-1)	Amino acid change† (UniProt canonical P61073-1)	Mutation	Total [n]	Frequency [%]	Germline variant published in WHIM	Somatic variant published in Malignancy	Germline or somatic variants with comparable molecular consequences	ClinVar	CXCR4base	dbSNP	HGMD	COSMIC	Allele frequency [NCBI dbSNP]	CADD raw	CADD PHRED	PS3 (functional studies supportive of a damaging effect on protein function)	PS4 (moderate strength: observed in multiple (≥3) unrelated patients with same phenotype)	PM2 (absent from population databases)	PM4 (protein length changing variant)	PM6 (assumed de novo without confirmation of maternity and paternity)	PP1 (observed to cosegregate with disease in multiple affected family members)	PP4 (observed in at least one patient presenting with most features of WHIM, including myelokathexis)
2:g.136872498G>A 2:g.136114928G>A	c.1000C>T	p.Arg334Ter	Nonsense	31	46.9697	PMID 31313072, 12692554, 14612668, 15026312, 19057201, 22596258	Waldenström macroglobulinemia / lymphoplasmacytic lymphoma (c.1000C>T, same p.R334*) PMID 24553177, 26490317, 26659815, 27268124, 30366921, 30408147, 31018969, 31221512, 32187361, 32260318, 32784523, 33713429, 33735664	–	14020 (pathogenic)	C0001-C0013, C0019, C0024, C0027, C0029-C0032	rs104893624	CM030831	COSV54010080	A=0.0 (0/478, ALFA Project) GnomAD v2.1.1 & v3.1.2 unknown	7.615455	38	Met (PMID: 16946301, PMID: 20592249, this study)	Met at moderate strength (PMID: 31313072, PMID: 12692554, PMID: 14612668, PMID: 15026312, PMID: 19057201, PMID: 22596258, this study (Pt 1, Pt 3, Pt 4, Pt 6, Pt 7, Pt 9, Pt 17, Pt 18, Pt 20, Pt 21, Pt 23, Pt 24, Pt 25, Pt 26, Pt 28, Pt 30, Pt 31, Pt 32, Pt 34, Pt 41, Pt 46, Pt 53, Pt 55, Pt 57, Pt 58, Pt 59, Pt 61, Pt 62))	Met (see "Allele frequency" column)	Met	Met (this study (Pt 1, Pt 3, Pt 4, Pt 6, Pt 18, Pt 20, Pt 21, Pt 23, Pt 24, Pt 25, Pt 26, Pt 27, Pt 30, Pt 31, Pt 32, Pt 34, Pt 41, Pt 46, Pt 53, Pt 55, Pt 57, Pt 62))	Met (PMID: 25662009, PMID: 12692554, PMID: 19043667, this study (Family II, Family III, Family V))	Met (this study (multiple patients, including Pt 23))	Pathogenic
2:g.136872485G>C,T 2:g.136114915G>C,T	c.1013C>G	p.Ser338Ter	Nonsense	11	16.6667	C>G: PMID 31313072, 15536153, 17087743, 18436740, 19057201, 22596258	Waldenström macroglobulinemia / IgM monoclonal gammopathy / lymphoma (c.1013C>A,G, same p.S338*) C>A,G: PMID 24553177, 26490317, 26659815, 27268124, 28903575, 30366921, 31018969, 32187361, 32784523, 33713429 C>G: PMID 27840426, 28280994, 30026568, 30408147, 31221512 p.S338* (no genotype): PMID 24912431, 33735664	–	14023 (pathogenic)	C>G: C0022, C0023, C0026, C0033, C0034	rs104893626	CM066016	COSV54009912 (c.1013C>G, p.S338*)	C=0.00000 (0/78700, PAGE_STUDY) GnomAD v2.1.1 & v3.1.2 unknown	7.310614 / 7.352885	37 / 38	c.1013C>G, p.S338*: Met (PMID: 22438253; PMID: 15536153, PMID: 18436740, PMID: 19321197)	c.1013C>G, p.S338*: Met at moderate strength (PMID: 31313072, PMID: 15536153, PMID: 17087743, PMID: 18436740, PMID: 19057201, PMID: 22596258, this study (Pt 2, Pt 11, Pt 15, Pt 29, Pt 42, Pt 45, Pt 48, Pt 49)	c.1013C>G, p.S338*: Met (see "Allele frequency" column)	c.1013C>G, p.S338*: Met	c.1013C>G, p.S338*: Met (PMID: 17087743, this study (Pt 2, Pt 15, Pt 45, Pt 48))	c.1013C>G, p.S338*: Met (this study (Family VIII, Family IX))	c.1013C>G, p.S338*: Met (this study (multiple patients, including Pt 2))	c.1013C>G, p.S338*: Pathogenic
	c.1013C>A					C>A: unpublished				–			COSV54010290 (c.1013C>A, p.S338*)				c.1013C>A, p.S338*: Not met	c.1013C>A, p.S338*: Not met	c.1013C>A, p.S338*: Met (see "Allele frequency" column)	c.1013C>A, p.S338*: Met	c.1013C>A, p.S338*: Met (this study (Pt 48))	c.1013C>A, p.S338*: Not met	c.1013C>A, p.S338*: Met (this study (Pt 48))	c.1013C>A, p.S338*: Likely Pathogenic
2:g.136872481_136872482dupAG 2:g.136114911_136114912dupAG	c.1016_1017dupCT	p.Val340LeufsTer27	Duplication	4	6.06061	unpublished	Lymphoma (c.1017_1018insTT, similar p.V340Lfs*27) PMID 30408147	p.V340Cfs*4 c.1016dupC or c.1017dupT in Waldenström macroglobulinemia / lymphoma {PMID 26659815, 27840426, 33713429} p.V340Gfs*4 c.1018dupG in lymphoma {PMID 27840426} p.V340Ffs*26 c.1017delT in Waldenström macroglobulinemia {PMID 26490317, 28903575, 30366921, 32784523}	–	–	–	–	COSV54009924 (c.1016dupC, p.V340Cfs*4) COSV99066292 (c.1017_1018insTT, p.V340Lfs*27)	GnomAD v2.1.1 & v3.1.2 unknown	5.133560	33	Met at supporting strength (this study)	Not met	Met (see "Allele frequency" column)	Met	Not met	Met (this study (Family VII)	Met (this study (Pt 37))	Likely Pathogenic
2:g.136872544delG 2:g.136114974delG	c.954delC	p.Ser319LeufsTer2	Deletion	2	3.0303	unpublished	Waldenström macroglobulinemia (c.954delC, same p.S319Lfs*2) PMID 26490317, 28903575, 30366921, 32784523	p.S319Lfs*25 c.954dupC in Waldenström macroglobulinemia {PMID 24553177, 26659815, 28903575, 30366921, 30408147, 33713429} p.S319Cfs*24 c.956_957delCT in Waldenström macroglobulinemia / lymphoma {PMID 29556019, 31018969}	–	–	–	–	COSV54013451 (c.954dupC, p.S319Lfs*25) COSV104385493 (c.956_957delCT, p.S319Cfs*24)	GnomAD v2.1.1 & v3.1.2 unknown	3.842348	26.5	Met at supporting strength (this study)	Not met	Met (see "Allele frequency" column)	Met	Not met	Not met	Not met	Variant of Uncertain Significance
2:g.136872483_136872486dupATGA 2:g.136114913_136114916dupATGA	c.1012_1015dupTCAT	p.Ser339PhefsTer6	Duplication	2	3.0303	Hassan A. Ahmad, conference article no. 177, submission ID#605673, in PMID 30809743	–	Germline in WHIM: p.S339Cfs*4 c.1016_1017delCT {PMID 12692554, 14612668, 16899028, 19057201, 22596258, 31313072, 32784523} Somatic in Malignancy: p.S339Cfs*4 c.1016_1017delCT in Waldenström macroglobulinemia / lymphoma {PMID 24553177, 27840426, 28903575, 29556019, 30366921} p.S339Lfs*24 c.1015_1024delTCTGTTTCCA in LPL {PMID 27840426} p.S339Ffs*26 c.1014_1017delATCT in Waldenström macroglobulinemi…	14021‡ (likely pathogenic)	–	–	–	COSV54015600 (c.1016_1017delCT, p.S339Cfs*4) COSV104527714 (c.1015_1024delTCTGTTTCCA, p.S339Lfs*24) COSV54011141 (c.1014_1017delATCT, p.S339Ffs*26)	GnomAD v2.1.1 & v3.1.2 unknown	5.062111	33	Not met	Met at moderate strength (PMID: 30809743 (Submission ID#605673), this study (Pt 12, Pt 13))	Met (see "Allele frequency" column)	Met	Met (this study (Pt 12))	Not met	Met (this study (Pt 12))	Likely Pathogenic
2:g.136872471C>A 2:g.136114901C>A	c.1027G>T	p.Glu343Ter	Nonsense	2	3.0303	PMID 12692554, 14612668, 19057201, 22596258, 31313072, 32784523	Waldenström macroglobulinemia (c.1027G>T, same p.E343*) PMID 33735664	–	14022 (pathogenic)	C0014, C0015	rs104893625	CM030832, CM125860	COSV54017436 (c.1027G>A, p.E343K, PMID22484628)	A=0.0 (0/478, ALFA Project) GnomAD v2.1.1 & v3.1.2 unknown	7.835276	39	Not met	Met at moderate strength (PMID: 9329467, 12692554, this study (Pt 19, Pt 36)	Met (see "Allele frequency" column)	Met	Met (this study (Pt 19))	Met (PMID: 12692554)	Met (this study (Pt 19, Pt 36))	Likely Pathogenic
2:g.136872546dupT 2:g.136114976dupT	c.952dupA	p.Thr318AsnfsTer26	Duplication	1	1.51515	unpublished	Waldenström macroglobulinemia / lymphoma (c.952dupA, same p.T318Nfs*26) PMID 24553177, 26490317, 26608593, 26659815, 27840426, 28280994, 28903575, 30366921, 31221512, 32784523, 33713429	p.T318Rfs*21 c.951_964delCACCTCTGTGAGCA in nodal marginal zone lymphomas {PMID 29556019} p.T318Yfs*26 c.951_952insT in nodal marginal zone lymphomas {PMID 29556019} p.T318Pfs*3 c.952delA in Waldenström macroglobulinemia {PMID 31018969} p.T318Cfs*24 c.952_956delACCTC in Waldenström macroglobulinemia {PMID 28903575}	988527 (pathogenic)	–	rs1684842255	–	COSV54009855	GnomAD v2.1.1 & v3.1.2 unknown	5.222515	33	Met at supporting strength (this study)	Not met	Met (see "Allele frequency" column)	Met	Met (this study (Pt 35))	Not met	Not met	Likely Pathogenic
2:g.136872535dupG 2:g.136114965dupG	c.963dupC	p.Arg322GlnfsTer22	Duplication	1	1.51515	unpublished	Waldenström macroglobulinemia / lymphoplasmacytic lymphoma (c.963dupC, same p.R322Qfs*22) PMID 24553177, 26490317, 28903575, 30366921, 30408147, 32784523	p.R322fs (genotype not reported) in Waldenström macroglobulinemia / lymphoplasmacytic lymphoma {PMID 33735664}	–	–	–	–	COSV54012992	GnomAD v2.1.1 & v3.1.2 unknown	5.609727	34	Met at supporting strength (this study)	Not met	Met (see "Allele frequency" column)	Met	Met (this study (Pt 55))	Not met	Not met	Likely Pathogenic
2:g.136872529delC 2:g.136114959delC	c.969delG	p.Ser324ProfsTer42	Deletion	1	1.51515	unpublished	Waldenström macroglobulinemia (c.970delT, similar p.S324Pfs*42) PMID 30366921	Germline in WHIM: p.S324Vfs*20 c.969dupG {PMID 31313072, 32784523} Somatic in Malignancy: p.S324Vfs*20 c.969dupG in Waldenström macroglobulinemia / lymphoma {PMID 24553177, 26659815, 28903575, 29556019, 30366921} p.S324Cfs*20 c.970_971insG in Waldenström macroglobulinemia {PMID 31018969}	–	–	–	–	COSV54012435 (c.969dupG, p.S324Vfs*20)	GnomAD v2.1.1 & v3.1.2 unknown	4.193565	29.4	Met at supporting strength (this study)	Not met	Met (see "Allele frequency" column)	Met	Not met	Not met	Met (this study (Pt 56))	Likely Pathogenic
2:g136872527_136872528insAGGA 2:g.136114957_136114958insAGGA	c.970_971insTCCT	p.Ser324PhefsTer21	Insertion	1	1.51515	DOI 10.24287/1726-1708-2020-19-4suppl-68-75	–	Germline in WHIM: p.S324Vfs*20 c.969dupG {PMID 31313072, 32784523} Somatic in Malignancy: p.S324Vfs*20 c.969dupG in Waldenström macroglobulinemia / lymphoma {PMID 24553177, 26659815, 28903575, 29556019, 30366921} p.S324Pfs*42 c.970delT in Waldenström macroglobulinemia {PMID 30366921} p.S324Cfs*20 c.970_971insG in Waldenström macroglobulinemia {PMID 31018969}	–	–	–	CI128719	COSV54012435 (c.969dupG, p.S324Vfs*20)	GnomAD v2.1.1 & v3.1.2 unknown	5.608831	34	Met at supporting strength (this study)	Not met	Met (see "Allele frequency" column)	Met	Met (this study (Pt 22))	Not met	Met (this study (Pt 22))	Likely Pathogenic
2:g.136872522dupG 2:g.136114952dupG	c.976dupC	p.Leu326ProfsTer18	Duplication	1	1.51515	DOI 10.24287/1726-1708-2020-19-4suppl-68-75	Waldenström macroglobulinemia (c.976dupC, same p.L326Pfs*18) PMID 28280994	p.L326fs (genotype not reported) in Waldenström macroglobulinemia / lymphoplasmacytic lymphoma {PMID 32822482, 33735664}	–	–	–	–	COSV54011153 (c.976dup, p.L326Pfs*18)	GnomAD v2.1.1 & v3.1.2 unknown	5.288436	33	Not met	Not met	Met (see "Allele frequency" column)	Met	Met (this study (Pt 14))	Not met	Met (this study (Pt 14))	Likely Pathogenic
2:g.136872520_136872521delGA 2:g.136114950_136114951delGA	c.977_978delTC	p.Leu326GlnfsTer17	Deletion	1	1.51515	unpublished	–	p.L326fs (genotype not reported) in Waldenström macroglobulinemia / lymphoplasmacytic lymphoma {PMID 32822482, 33735664} p.L326Pfs*18 c.976dupC in Waldenström macroglobulinemia {PMID 28280994}	–	–	–	–	COSV54011153 (c.976dup, p.L326Pfs*18)	GnomAD v2.1.1 & v3.1.2 unknown	5.279305	33	Met at supporting strength (this study)	Not met	Met (see "Allele frequency" column)	Met	Met (this study (Pt 10))	Not met	Met (this study (Pt 10))	Likely Pathogenic
2:g.136872518_136872519insC 2:g.136114948_136114949insC	c.979_980insG	p.Lys327ArgfsTer17	Insertion	1	1.51515	unpublished	–	p.K327Qfs*17 c.978dupC in Waldenström macroglobulinemia {PMID 26490317, 28903575, 30366921, 32784523} p.K327Tfs*37 c.980_986delAGATCCTin Waldenström macroglobulinemia {PMID 32784523}	–	–	–	–	COSV54012262 (c.978dupC, p.K327Qfs*17)	GnomAD v2.1.1 & v3.1.2 unknown	5.417788	33	Met at supporting strength (this study)	Not met	Met (see "Allele frequency" column)	Met	Not met	Not met	Met (this study (Pt 63))	Likely Pathogenic
2:g.136872458_136872461delGAAG 2:g.136114888_136114891delGAAG	c.1037_1040delCTTC	p.Ser346Ter	Deletion	1	1.51515	unpublished	–	p.S346Ffs*9 c.1037_1044delCTTCAAGT in DLBCL {PMID 32187361} p.S346Vfs*12 c.1035dupG in Waldenström macroglobulinemia {PMID 26659815}	–	–	–	–	COSV105020876 (c.1037_1044delCTTCAAGT, p.S346Ffs*9) COSV54013686 (c.1035dupG, p.S346Vfs*12)	GnomAD v2.1.1 & v3.1.2 unknown	5.684590	34	Met at supporting strength (this study)	Not met	Met (see "Allele frequency" column)	Met	Met (this study (Pt 66))	Not met	Not met	Likely Pathogenic
2:g.136872484delT 2:g.136114914delT	c.1014delA	p.Ser339LeufsTer27	Deletion	1	1.51515	unpublished	–	Germline in WHIM: p.S339Cfs*4 c.1016_1017delCT {PMID 12692554, 14612668, 16899028, 19057201, 22596258, 31313072, 32784523} Somatic in Malignancy: p.S339Cfs*4 c.1016_1017delCT in Waldenström macroglobulinemia / lymphoma {PMID 24553177, 27840426, 28903575, 29556019, 30366921} p.S339Lfs*24 c.1015_1024delTCTGTTTCCA in LPL {PMID 27840426} p.S339Ffs*26 c.1014_1017delATCT in Waldenström macroglobulinemi…	14021‡ (likely pathogenic)	–	–	–	COSV54015600 (c.1016_1017delCT, p.S339Cfs*4) COSV104527714 (c.1015_1024delTCTGTTTCCA, p.S339Lfs*24) COSV54011141 (c.1014_1017delATCT, p.S339Ffs*26)	GnomAD v2.1.1 & v3.1.2 unknown	2.412856	22.4	Met at supporting strength (this study)	Not met	Met (see "Allele frequency" column)	Met	Not met	Not met	Not met	Variant of Uncertain Significance
2:g.136872464_136872605dup 2:g.136114894_136115035dup	c.893_1034dup	p.Ser346ProfsTer12	Duplication	1	1.51515	unpublished	–	p.S346Ffs*9 c.1037_1044delCTTCAAGT in DLBCL {PMID 32187361} p.S346Vfs*12 c.1035dupG in Waldenström macroglobulinemia {PMID 26659815}	–	–	–	–	COSV105020876 (c.1037_1044delCTTCAAGT, p.S346Ffs*9) COSV54013686 (c.1035dupG, p.S346Vfs*12)	GnomAD v2.1.1 & v3.1.2 unknown	5.812956	34	Not met	Not met	Met (see "Allele frequency" column)	Met	Met (this study (Pt 64))	Not met	Met (this study (Pt 64))	Likely Pathogenic
	No data available			4	6.06061
				66	100				total
	*RefSeq: NM_003467.3 ENSEMBL: ENST00000241393.3	†RefSeq: NP_003458.1 ENSEMBL: ENSP00000241393.3							‡comparable frameshift, other genetic cause {rs730880320}: NM_003467.2(CXCR4):c.1016_1017delCT (p.Ser339CysfsTer4) {PMID 12692554}
	**c.1013C>A (tAa) unpublished, having same **effect as c.1013C>G (tGa) p.Ser338Ter
