# Supplementary material for: Disease Progression of WHIM Syndrome in an International Cohort of 66 Pediatric and Adult Patients
Source: J Clin Immunol. 2022 Aug 10;42(8):1748–65. doi: 10.1007/s10875-022-01312-7 (PMC9700649; doi:10.1007/s10875-022-01312-7)
Supplement: Supplementary file 7 — (XLSX 11 kb) [file 10875_2022_1312_MOESM6_ESM.xlsx]

## Sheet: Sheet1
p.Thr318Pro fs*3	Dotta et al., High Risk of Lung Disease and HPV-Related Malignancies. J Allergy Clin Immunol Pract [Internet]. American Academy of Allergy, Asthma and Immunology; 2019
p.Ser319Cys fs*24	Moens et al.,Successful hematopoietic stem cell transplantation for myelofibrosis in an adult with warts-hypogammaglobulinemia-immunodeficiency-myelokathexis syndrome, J Allergy Clin Immunol. 2016 Nov;138(5):1485-1489.e2.
p.Val320Glufs*23	Y.Gemez MDPhD, J. Chavez PhD, J. Bussel MD and C. Cunnigham-Rundles MD PhD. Unexpected diagnosis in a family with autoimmune multilineage cytopenia and hypogammaglobuninemia. Poster presentation at the 2019 Clinical Immunology Society Meeting., Pathforward
p.Gly323Val fs*20	Shin, D.W., et al., WHIM Syndrome With a Novel CXCR4 Variant in a Korean Child. Annals of laboratory medicine, 2017. 37: p. 446-449.
p.Ser324Val fs*20	Heusinkveld, L. et al., WHIM Syndrome: from Pathogenesis to Personalized Medicine and Cure, JCI 2019, 36:352., Pathforward
p.Leu329Gln fs*13	Heusinkveld, L. et al., WHIM Syndrome: from Pathogenesis to Personalized Medicine and Cure, JCI 2019, 36:352.
p.Arg334*	Heusinkveld, L. et al., WHIM Syndrome: from Pathogenesis to Personalized Medicine and Cure, JCI 2019, 36:352.
p.Gly336*	Heusinkveld, L. et al., WHIM Syndrome: from Pathogenesis to Personalized Medicine and Cure, JCI 2019, 36:352.
p.Ser338*	Heusinkveld, L. et al., WHIM Syndrome: from Pathogenesis to Personalized Medicine and Cure, JCI 2019, 36:352.
p.Ser339Cys fs*4	Heusinkveld, L. et al., WHIM Syndrome: from Pathogenesis to Personalized Medicine and Cure, JCI 2019, 36:352.
p.Ser339Phe fs*6	Heusinkveld, L. et al., WHIM Syndrome: from Pathogenesis to Personalized Medicine and Cure, JCI 2019, 36:352.
p.Ser341Pro fs*25	Heusinkveld, L. et al., WHIM Syndrome: from Pathogenesis to Personalized Medicine and Cure, JCI 2019, 36:352.
p.Glu343*	Heusinkveld, L. et al., WHIM Syndrome: from Pathogenesis to Personalized Medicine and Cure, JCI 2019, 36:352.
p.Glu343Lys	Heusinkveld, L. et al., WHIM Syndrome: from Pathogenesis to Personalized Medicine and Cure, JCI 2019, 36:352.
p. S324Pfs*41	Dale et al, 2020, Results of a phase 2 trial of an oral CXCR4 antagonist, mavorixafor, for treatment of WHIM syndrome
p.Leu326Profs*18	Deordieva et al, 2020, DOI 10.24287/1726-1708-2020-19-4suppl-68-75
p.Thr342fs *23	ClinVar
p.Val340Leufs*27	Geier, CB et. al., Natural History of Variable Clinical Presentation in an International Cohort of 66 Patients with WHIM Syndrome, in Revision
p.Thr318Asnfs*26	Geier, CB et. al., Natural History of Variable Clinical Presentation in an International Cohort of 66 Patients with WHIM Syndrome, in Revision
p.Ser319Leufs*2	Geier, CB et. al., Natural History of Variable Clinical Presentation in an International Cohort of 66 Patients with WHIM Syndrome, in Revision
p.Arg322Glnfs*22	Geier, CB et. al., Natural History of Variable Clinical Presentation in an International Cohort of 66 Patients with WHIM Syndrome, in Revision
p.Leu326Glnfs*17	Geier, CB et. al., Natural History of Variable Clinical Presentation in an International Cohort of 66 Patients with WHIM Syndrome, in Revision
p.Ser324Profs*42	Geier, CB et. al., Natural History of Variable Clinical Presentation in an International Cohort of 66 Patients with WHIM Syndrome, in Revision
p.Ser324Phefs*21	Geier, CB et. al., Natural History of Variable Clinical Presentation in an International Cohort of 66 Patients with WHIM Syndrome, in Revision
p.Lys327Argfs*17	Geier, CB et. al., Natural History of Variable Clinical Presentation in an International Cohort of 66 Patients with WHIM Syndrome, in Revision
p.Ser346*	Geier, CB et. al., Natural History of Variable Clinical Presentation in an International Cohort of 66 Patients with WHIM Syndrome, in Revision
p.Ser339Leufs*27	Geier, CB et. al., Natural History of Variable Clinical Presentation in an International Cohort of 66 Patients with WHIM Syndrome, in Revision
p.Ser346Profs*12	Geier, CB et. al., Natural History of Variable Clinical Presentation in an International Cohort of 66 Patients with WHIM Syndrome, in Revision
